# Supplementary material
Source: publisher figshare collection journal article supplement (https://diabetesjournals.figshare.com/ndownloader/files/39522478)
Supplement: Supplementary file 1 [file 39522478]

## Sheet: Promoter_p<0.05;2-FC; DEG 
	Supplemental Table 4
	DAC at Promoters, 2-Fold Changel, p<0.05
	Differential open chromatin at promoter (pval<0.05, log2(FC) >1)	Differential closed chromatin at promoter (pval<0.05, log2(FC) <1)		Overlapping genes (upReg in Chd4Db and Open Promoter)	Overlapping genes (DownReg in Chd4Db and Closed Promoter)
	Kcna4	D830030K20Rik		Kcnh2	Syt10
	Tenm1	Adhfe1		Gpa33	Sertm1
	Rrp9	Synpr		Chd5	Col5a2
	Plxnb2	Ppp1r3g		Gm5105	Lvrn
	Nrg3	Llgl2		Cadm4	Gm45623
	H2-Q1	Syt10		Ccdc136	Spon1
	Chad	Pdzrn4		Prr36	Pygo1
	Erich2	Gm2436		Plcxd1	Sgcd
	H2-Q3	Lonrf2		P2rx6	Lonrf2
	Adra2b	Gm20553		Slc22a21	Epdr1
	Pdzd2	Npy2r		G430095P16Rik	Gpr27
	Pdgfrb	Tacstd2		Pde1b	Entpd5
	Phc2	Otx1		Lipo3
	Olig1	Tal2		Acaa1b
	Ccn4	Nrcam		Hyal1
	Anks1b	Nr5a1		Map1a
	Frat1	Cntnap3		Pqlc3
	Unc13a	Cntrl		Sh3bgrl2
	Jup	Pygo1		Kndc1
	Tmem82	Disc1		Ano7
	H2-Bl	Traf7		Reep1
	Rapgef5	Scml4		Rasal1
	Hspg2	Sertm1		Egfl7
	Cdh7	Zfp608		Hdac7
	Car12	Efemp1		Shank2
	Ascl5	Ap1b1		Ceacam10
	Trbv12-2	Trim12a		Gc
	Rnf165	Gabra2		Matk
	Cbs	Lrp2		Neurl1a
	Cfap44	Sp9		Ngef
	Ppm1h	Ptx3		Speg
	Zfp57	Klrb1f		Lmo1
	Lynx1	Zfp217		Aldob
	Ube2e1	Zfp800		Cyth4
	Akap6	Epdr1		Lmo2
	Arhgap22	Fsd2		Pbx4
	Ccna1	Pkdrej		Camta1
	Dlx1	Gpr27		Arhgef4
	Pcdhgb2	Dmrta1		Catsperg1
	Dtna	A4galt		Rnf39
	Sema3e	Gm45623		2700054A10Rik
	Prcd	Kcng1		Mapkapk3
	Dnaaf3	Entpd5		Onecut2
	Moxd1	Col5a2		Shisa7
	Cd81	Gm7177		Crtac1
	Rnf17	Rbm15		Tifab
	Cass4	Ptgfr		Gm11945
	Adam11	Itih1		Chst7
	Arhgap24	Parvb		AW011738
	4933432I09Rik	Gm8281		Sspo
	Lama5	Gm2897		Fam13a
	Nxf2	Gm23405		1700001L19Rik
	Galnt6	Cacna1i		Abhd11os
	Otx1	Stac		Fads2
	Fyb2	Hnrnpc		Clip4
	Kcp	Tex45		Scd1
	Neurod6	Alox5ap		H2bu2
	Cyp1b1	Grem1		Serpine1
	Gdf1	Tmem26		Gimap1
	Irx2	Dchs2		Gm15753
	Gjb2	Tbx2		Urah
	Psd2	She		Hhatl
	Mlph	Prtg		Prrt3
	Pakap	Lvrn		Kcna5
	Zfp454	Gpr149		Gm2115
	Septin9	Gm3739		Tspear
	Pnp2	Ajap1		Plk5
	Ttyh1	Npy5r		Rnf112
	Paqr6	Sgcd		Zfp811
	Ninl	Akt1		Hspb8
	Klhl13	Prok2		Cacna2d2
	Hs3st5	Rab38		Necab3
	Smim24	Ptgis		Pcdhga2
	Kcnip4	Slc25a38		Mapk12
	Pigz	Eva1a		Scarf2
	Irf6	Spon1		Tm6sf2
	Tomm20l	Tmem178		Sod3
	Mal	Slc5a1		Arhgap22
	Gpr153	Sox1ot		Kctd17
	Gnal	Rims1		Arhgef10l
	Stc1	Gm23527		Prrt4
	Tnfrsf19			Parp3
	Urah			Tcea3
	Cdh12			Rassf2
	Mfsd2a			Slc22a18
	Syt1			Tmem221
	Mab21l4			Gstm7
	Sox2			P4ha2
	Art5			Lrrc17
	Cdca7l			C1rl
	Pld6			Lrrc8e
	Ifit2			Vsir
	Nqo1			Tubb4a
	Dclk3			Hsd17b13
	AI463229			Gpc2
	Lpcat2			6330403K07Rik
	Sorcs1			Bmp7
	Megf6			Acacb
	Ppp1r14a			Ephb3
	BC016579			B3gnt7
	Gimap9			Arnt2
	Hdac7			Smim24
	Ptgs1			Prodh
	Asb2			Fads3
	Abcb1b			Ambp
	Kcns3			Tmem37
	Ido1			Kcp
	Cdc20			Prr5
	A930003O13Rik			Timp3
	Scarf2			Nup62cl
	Samd11			Adam11
	1700113H08Rik			Cd81
	Oprl1			Kcnip3
	Mapkapk3			Aadat
	Vrk1			C430042M11Rik
	Iqca			Slc2a10
	Trim16			Adprhl1
	Kcna1			Mkrn3
	Popdc2			Rgs8
	Stk32c			Des
	Slc22a1			Kcnt1
	Cacng7			Atp10a
	Gp1bb			Tnfaip2
	4933412O06Rik			Lhpp
	Nes			Gjb2
	Tenm2			Gstm2
	Tmeff2			Tesc
	Slc13a5			Epha10
	Lfng			Tns1
	Tlcd2			Snhg11
	Glipr1l1			Ces1d
	Acot11			Emp2
	Ppp2r3d			Als2cl
	Gdf3			Best1
	Hectd2os			Lrrc9
	Plat			Rapgef3
	Shc3			Cox6b2
	AW822252			Kit
	Nyap1			Smoc1
	Opcml			Gm10030
	Mir99ahg			Dnah1
	Dnah7b			Tmem82
	Plcb2			Tmem59l
	Prss23			Ccn3
	Slc22a21			5033406O09Rik
	Mkx			Zfyve28
	Cdh9			Jakmip2
	Arhgap10			Art5
	Gm336			Prss23
	Ets1			AI854703
	Angptl8			Cyp2s1
	Rassf2			Gm21057
	Gm26497			Ttbk1
	Pde1b			Eef1a2
	Timp3			Fyb2
	Plekhg5			Iglon5
	9030624G23Rik			Thrsp
	Abcg4			Nr0b2
	Sox18			Trf
	Rab42			Shc3
	Caps2			Mamstr
	Akr1c19			Myh7
	Adamtsl2			Epas1
	Spata4			Tmem179
	Pik3r2			AI197445
	Selenbp1			Zfp57
	Smim6			Snx31
	Tinagl1			Sfrp1
	Mir124a-3			Abcg4
	Sulf1			Pou3f4
	Lhpp			Rin1
	Egln3			Fbln2
	Irs3			Tinagl1
	Speg			Plekhf1
	Arid1a			Angptl4
	Fnbp1			Adamts20
	Grin2b			Ifitm2
	Elmo1			Adcy1
	Tescl			Mab21l4
	Pcdhga1			Fsd1
	Capn12			Ankrd34b
	Gper1			Fetub
	Ece1			Cend1
	Cadm4			Tmem252
	Gm5105			Irs3
	Ttc6			Adamtsl5
	Iqsec1			Otop3
	Ddit4l			Plin5
	Sh3bgrl2			Cacna2d4
	Tifab			Chst13
	Src			Ccdc13
	Arhgef10l			Gm5134
	Angptl4			Gstm6
	Ppp1r36			Pipox
	Plaat1			Dpysl4
	Loxl1			Kcns3
	Sema4a			Fam163b
	Plekhg6			Hk2
	BC034090			Higd1a
	Fam13a			Chad
	Gpr165			Zfp345
	Csrp2			Gstm3
	Fam131b			Camk2a
	Ccer2			Kcnk5
	Gm2115			1700048O20Rik
	Klk10			Gli2
	Ngef			Gask1a
	Kcnb1			Cd248
	Itga2b			D030045P18Rik
	Sstr1			Acy3
	Camk2b			Cpz
	Hyal1			Mmel1
	Osm			Elavl3
	Entpd8			C1qtnf1
	Lmo2			Aspg
	Batf3			Tcfl5
	Dnajc22			Faim2
	Tfr2			Col5a3
	Gm2956
	Hs3st3a1
	Nhs
	Acpp
	Pla2r1
	Dst
	Amotl2
	AA986860
	Eps8l1
	Adcy1
	Zfp663
	Pcdhgb4
	Hykk
	Mir7688
	Gc
	Tril
	Onecut2
	Jcad
	Slc2a10
	Neurl1a
	Kcnmb1
	Ifitm3
	Emp2
	Bmp6
	Pcsk5
	Arhgef17
	Ube2u
	Nid2
	Amz1
	Gli2
	Btn1a1
	H2bu2
	Oplah
	Rbfox1
	P2rx6
	Htr7
	Neurl3
	6430628N08Rik
	Xkrx
	Fgr
	Por
	Egfl6
	Gpld1
	Gabre
	Chrne
	Acaa1b
	Prdm8
	C130026L21Rik
	Prr36
	Prkd2
	Pcdhgb6
	Lipo3
	Elfn2
	Rbm44
	Cav2
	Rnf39
	Ripk3
	Drd2
	Kcnk7
	Nadk2
	Nfic
	Rgs3
	Clip4
	Ldoc1
	Kcnip3
	Nt5c2
	Arg1
	Phf24
	Aadat
	6330403K07Rik
	Kdr
	Sema4f
	Gm10030
	Gramd1b
	Slc46a2
	Adprhl1
	Emp1
	Amh
	Ulbp1
	Plcxd3
	Col9a2
	P4ha2
	Prtn3
	Rgs8
	Car9
	Col1a2
	AW011738
	Aire
	9530059O14Rik
	Plekhf1
	Sox8
	Spef2
	Atf7ip
	Arhgef4
	Zfpm1
	Stard8
	Gulo
	Plekhn1
	Abt1
	Grm3
	Atp10a
	Dnah7a
	Tmem154
	Cap2
	Pcdhgb7
	Kcnt1
	Prrt4
	Tnfrsf1b
	Vash2
	Serpine1
	Gm15753
	Tenm4
	Ankrd29
	Rims1
	4930555F03Rik
	Phactr1
	Dhx32
	Mospd1
	Kank3
	Crip3
	Zfp819
	Zfp541
	AI854703
	Dgcr6
	Arhgef19
	Gm5122
	Ano7
	Hspb8
	Prrg2
	Rasal1
	Ccdc170
	5330416C01Rik
	Ambp
	Plk5
	Cnr2
	Tacc1
	Niban3
	Cd37
	Lrrc8e
	Vstm4
	Cdh18
	Fads2
	Platr4
	H2bc22
	Dab2ip
	Ago2
	Nrxn2
	Mapk12
	Ak7
	Kit
	Ccdc158
	Plcl1
	Tmem59l
	Reep1
	Psd3
	Ccdc162
	Stard4
	Olfml2a
	Ptgir
	Tmem37
	Prickle2
	Gng10
	Mmp16
	Sh3tc2
	Osr2
	Aim2
	Tspan18
	Gm23100
	Crb2
	Arhgef40
	Khdrbs2
	L3mbtl1
	Capn6
	Tmem179
	Nipsnap1
	Tcea3
	Pbx4
	Ppp1r3b
	Deup1
	Rbpms
	Tvp23a
	Irf4
	Pir
	Nfe2l3
	Trim6
	Fads3
	Gda
	Tubb6
	Otop3
	Gata3
	Blnk
	Elovl3
	Cacna2d4
	Tspear
	Apc2
	Map1a
	Otof
	Edar
	Zic3
	Cacna2d2
	Pcdh9
	Ncan
	Rsph6a
	Rapgef3
	Sox21
	Gtf2a1l
	Ephb1
	Lexm
	Tmem249
	Ccn3
	Fuca2
	Trf
	Kcnh2
	Krt19
	Dlg3
	Mc4r
	Crtac1
	Prrt3
	Ttc23
	Syt16
	Il11ra1
	Cdr1os
	Abhd11os
	Aldob
	Ttbk1
	Tm6sf2
	Rap1gap
	Slc8a2
	Smoc1
	Sod3
	Etv4
	Lrriq1
	Slit1
	Snhg11
	Kndc1
	Necab3
	Tbx3
	1190005I06Rik
	Hoga1
	Des
	Wscd2
	Alas2
	Acsm3
	Zfp106
	Zmat4
	1700125G02Rik
	Trim63
	Pqlc3
	Ifi27l2a
	Pecam1
	1700092K14Rik
	Dnah7c
	Ryr2
	Tcaf2
	Marchf1
	Fcrl1
	Elavl3
	Acacb
	Hoxc10
	Slc8a3
	Sfrp1
	Bmp7
	Gng13
	Lrrc74b
	Tbx20
	Slitrk2
	Creb3l4
	Chst7
	Col9a1
	Catsperg1
	Sbk1
	Plec
	Gpx8
	Hsd17b13
	5430431A17Rik
	Gpc2
	Bdkrb2
	Col6a2
	Pllp
	Dpp6
	Myh7
	Gm7389
	Hhatl
	Pdlim2
	Lrat
	Gpa33
	Thy1
	5730507C01Rik
	Tns1
	Neurog2
	Dnajb13
	Lmo1
	5033406O09Rik
	Pdlim1
	Trim2
	Cyp2s1
	Myo7a
	Pcdhga3
	Best1
	Ttc39b
	Atp4a
	Lrrc17
	Slc6a1
	Eef1a2
	Rpl21-ps7
	Gm4767
	Rhcg
	Cd248
	Map4k1
	Gm11945
	Adcy7
	C1qtnf1
	Gabrq
	Afap1l2
	Eml2
	Ugt8a
	Mamstr
	Pcdhgb5
	Matk
	Ppp1r9b
	Gm8177
	Znrf1
	Dnm2
	Plekhg4
	Mctp2
	Pcdhga4
	Ccdc13
	Col18a1
	Mast3
	Dlg4
	Akr1b8
	Six2
	G430095P16Rik
	Eps15
	Platr27
	Proca1
	Slc16a3
	Arnt2
	Ephb3
	Celsr3
	Glyctk
	Tubb4a
	1600029I14Rik
	Chd5
	Slc25a48
	Gabrg1
	Abr
	Trpv6
	Shank2
	Prr5
	Dmc1
	Iglon5
	Eda2r
	Kcnj10
	C1rl
	Hspb3
	Camta2
	Scd1
	Smim45
	D030068K23Rik
	Gstm7
	Pcdh20
	Adamts20
	Snx31
	B3gnt7
	Plch2
	Arhgef1
	Prodh2
	Lrrc9
	Rai1
	Gimap1
	Sall3
	Noxa1
	Sdhb
	Pnma8c
	Cpne9
	Igdcc3
	Prodh
	Emp3
	Egfl7
	Nup62cl
	Sp100
	Cntn2
	Tnfaip2
	Tead3
	Epas1
	Epha10
	Tmem221
	Dnah1
	Gpr139
	Jam3
	Gm5134
	Fbln2
	Slc16a7
	Pou3f4
	Iyd
	4921504E06Rik
	Tmem45a
	Col16a1
	Kctd17
	Zap70
	2700054A10Rik
	Zscan2
	Fam169a
	6330409D20Rik
	Otud7a
	Pde4a
	Tll2
	Itgbl1
	Plekhd1os
	Slc9b2
	Parp3
	Nrxn3
	Cfap53
	Plcxd1
	Tmem252
	Kif6
	Dgkz
	Mdga1
	Mkrn3
	Hmga1b
	Dhx58
	Adamts15
	Tesc
	Pm20d1
	Tnk1
	Adamtsl5
	Hk2
	Ftl1-ps2
	Aspg
	Armh4
	Efcab3
	Cyb5r2
	Palm
	Plin5
	2410018L13Rik
	Ccdc102a
	Prkcq
	Shisa7
	Ltbp3
	Nr0b2
	Camta1
	Rnf112
	Itih5
	Dpysl4
	Apobec2
	Ceacam10
	Ces1d
	Jakmip2
	Tdrd9
	Tnnt1
	Pde4d
	Slc22a18
	Tceal3
	Fuz
	Comp
	Srrm4
	Stmn4
	ccdc198
	Hnf4a
	Kcnk5
	Hk1
	Prrg1
	Ankrd34b
	Wbp2nl
	Apol7a
	Slc7a7
	Chst13
	Zfp811
	Cmklr1
	Als2cl
	Gm3716
	Mab21l3
	1700028P14Rik
	Thrsp
	Ifitm2
	Fsd1
	Fam163b
	Rufy1
	Dkkl1
	Mybpc2
	Lpar3
	Aldh1l1
	1810063I02Rik
	Tmx3
	2610028E06Rik
	Gstm6
	Sh2d6
	Fetub
	Cdh15
	4930433N12Rik
	Sgsm1
	Rny3
	Sspo
	Oprk1
	Kcns2
	Ryr1
	Rin1
	Cyth4
	Cbr2
	Gm21057
	Gm30400
	Apela
	Gstm3
	Lrrc34
	Kcna5
	Selplg
	Tspoap1
	Gstm2
	AI197445
	Ebf1
	Rap1gap2
	Cox6b2
	Atp8b3
	Syn3
	Rbakdn
	Mmel1
	Cend1
	Higd1a
	Pcdhga2
	Macc1
	Zfyve28
	Clta
	1700001L19Rik
	Pipox
	Tafa4
	Ccdc136
	Tcfl5
	Rbfox2
	Masp2
	Olig2
	Cfap161
	H2-Oa
	Cpz
	Vsir
	Smarca5-ps
	Faim2
	Gm7932
	Gstk1
	Ethe1
	Prss50
	Mtarc2
	Mir7220
	Hmg20b
	Camk2a
	Ushbp1
	Efcab6
	Gm13135
	Gask1a
	Zfp345
	Izumo1
	Crebzf
	Lrrc25
	C430042M11Rik
	Ldha
	Acy3
	Gjb5
	Col22a1
	D030045P18Rik
	Etl4
	Trim47
	Gm10505
	Col5a3
	Scarb1
	Igfbp3
	Rpl36
	Catsperg2
	Hnrnpll
	Gm32916
	Parp16
	Ttc29
	Mrgprf
	1700048O20Rik

## Sheet: GO-up-open + down-closed
Supplemental Table 4
Gene Ontology
Term	P-value	Genes
cell differentiation in hindbrain (GO:0021533)	0.000305868	CEND1;FAIM2;KNDC1
potassium ion export across plasma membrane (GO:0097623)	0.000497537	KCNH2;KCNK5;KCNA5
central nervous system neuron differentiation (GO:0021953)	0.00060266	CEND1;CHD5;FAIM2;KNDC1
cerebellar Purkinje cell differentiation (GO:0021702)	0.00128702	CEND1;FAIM2
regulation of insulin secretion (GO:0050796)	0.00128767	SFRP1;KCNS3;CACNA2D2;CCN3;KCNA5;RAPGEF3
negative regulation of SMAD protein signal transduction (GO:0060392)	0.0019159	SLC2A10;CCN3
positive regulation of extrinsic apoptotic signaling pathway via death domain receptors (GO:1902043)	0.0019159	SFRP1;TIMP3
negative regulation of NIK/NF-kappaB signaling (GO:1901223)	0.00254167	CCN3;BMP7;HDAC7
xenobiotic catabolic process (GO:0042178)	0.00266195	GSTM3;GSTM2
actin-mediated cell contraction (GO:0070252)	0.00449459	EPDR1;EMP2
negative regulation of lipase activity (GO:0060192)	0.00449459	ANGPTL4;PLIN5
chondroitin sulfate metabolic process (GO:0030204)	0.00484667	CHST7;HYAL1;CHST13
positive regulation of lipid kinase activity (GO:0090218)	0.00484667	CD81;EEF1A2;KIT
protein localization to plasma membrane (GO:0072659)	0.00492892	FYB2;PLEKHF1;CD81;TESC;KCNIP3;EMP2
glycosaminoglycan biosynthetic process (GO:0006024)	0.00526831	CHST7;B3GNT7;HYAL1;GPC2;CHST13
regulation of potassium ion transport (GO:0043266)	0.00532095	KCNH2;KCNIP3;KCNA5
protein localization to cell periphery (GO:1990778)	0.00566689	FYB2;PLEKHF1;CD81;TESC;KCNIP3;EMP2
metal ion export (GO:0070839)	0.00582217	KCNK5;KCNH2;KCNA5
positive regulation of vasculature development (GO:1904018)	0.00650297	HYAL1;SERPINE1;ANGPTL4;HK2;RAPGEF3
regulation of CD4-positive, alpha-beta T cell proliferation (GO:2000561)	0.00676349	CD81;VSIR
carnitine shuttle (GO:0006853)	0.00676349	THRSP;ACACB
embryonic organ development (GO:0048568)	0.007037	RNF112;KIT;PBX4;GLI2
cochlea morphogenesis (GO:0090103)	0.00805501	TIFAB;POU3F4
epithelial cell-cell adhesion (GO:0090136)	0.00805501	KIT;CCN3
lysine catabolic process (GO:0006554)	0.00805501	AADAT;PIPOX
lysine metabolic process (GO:0006553)	0.00805501	AADAT;PIPOX
regulation of endopeptidase activity (GO:0052548)	0.00907537	SERPINE1;TIMP3;FETUB;VSIR
regulation of angiogenesis (GO:0045765)	0.00924672	SFRP1;HYAL1;SERPINE1;EMP2;ANGPTL4;RAPGEF3;HK2
sulfur compound biosynthetic process (GO:0044272)	0.00990717	GSTM3;GSTM2;CHST7;B3GNT7;CHST13
positive regulation of kinase activity (GO:0033674)	0.0102672	RASSF2;EPHA10;EEF1A2;KIT;EPHB3
regulation of peptide hormone secretion (GO:0090276)	0.0104655	KCNS3;CACNA2D2;KCNA5;RAPGEF3
digestive tract development (GO:0048565)	0.010844	KIT;GLI2;EPHB3
regulation of integrin-mediated signaling pathway (GO:2001044)	0.0109396	SLC2A10;EMP2
positive regulation of long-term synaptic potentiation (GO:1900273)	0.0109396	ADCY1;SHISA7
positive regulation of angiogenesis (GO:0045766)	0.0110139	HYAL1;SERPINE1;ANGPTL4;HK2;RAPGEF3
heart contraction (GO:0060047)	0.0116026	KCNH2;SGCD;MYH7
regulation of extrinsic apoptotic signaling pathway via death domain receptors (GO:1902041)	0.0123909	SFRP1;SERPINE1;FAIM2
membrane repolarization during cardiac muscle cell action potential (GO:0086013)	0.0125278	KCNH2;KCNA5
myoblast differentiation (GO:0045445)	0.0125278	EPAS1;MAPK12
regulation of NIK/NF-kappaB signaling (GO:1901222)	0.0136422	RASSF2;CCN3;BMP7;HDAC7
positive regulation of stress fiber assembly (GO:0051496)	0.0140578	SFRP1;ARHGEF10L;RAPGEF3
peptide metabolic process (GO:0006518)	0.0154367	GSTM3;GSTM2;LVRN;CPZ
negative regulation of insulin secretion (GO:0046676)	0.0159838	SFRP1;CCN3
negative regulation of peptide hormone secretion (GO:0090278)	0.017847	SFRP1;CCN3
regulation of spindle organization (GO:0090224)	0.017847	PARP3;FSD1
aspartate family amino acid catabolic process (GO:0009068)	0.0197973	AADAT;PIPOX
fatty acid transmembrane transport (GO:1902001)	0.0197973	THRSP;ACACB
